# Supplementary material for: An ATRP-based approach towards water-borne anisotropic polymer–Gibbsite nanocomposites
Source: Royal Society of Chemistry journal article supplement (doi:10.1039/c6py00225k), 2016-01-01
Supplement: c6py00225k1.pdf [file c6py00225k1.pdf]

Supporting information to

## **An ATRP-based approach towards water-borne anisotropic polymer-Gibbsite nanocomposites**

Olessya P. Loiko,<sup>a</sup> Anne B. Spoelstra,<sup>a</sup> Alexander M. van Herk,<sup>a,b</sup> Jan Meuldijk<sup>a</sup> and Johan P.A. Heuts<sup>\*a</sup>

---

<sup>a</sup> Department of Chemical Engineering and Chemistry, Eindhoven University of Technology, PO Box 513, 5600 MB Eindhoven, The Netherlands. E-mail: j.p.a.heuts@tue.nl

<sup>b</sup> Institute of Chemical and Engineering Sciences, 1 Pesek Road, Jurong Island 627833, Singapore.

## Synthesis and characterisation of anionic random ATRP copolymer

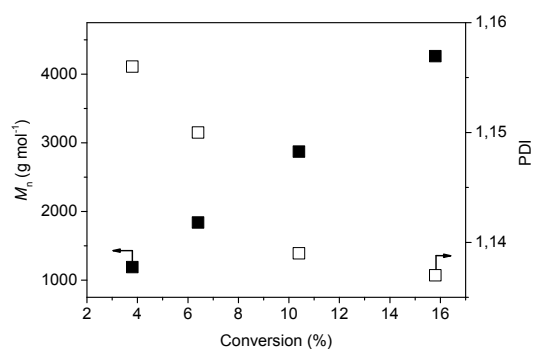

**Figure S1.** Plot of  $M_n$  and PDI vs monomer conversion for BA-co-tBA at [monomer]:[2-bromo-2-methylpropionic acid phenyl ester]= 200:1 in the presence of 10 vol% DMF at 70 °C.

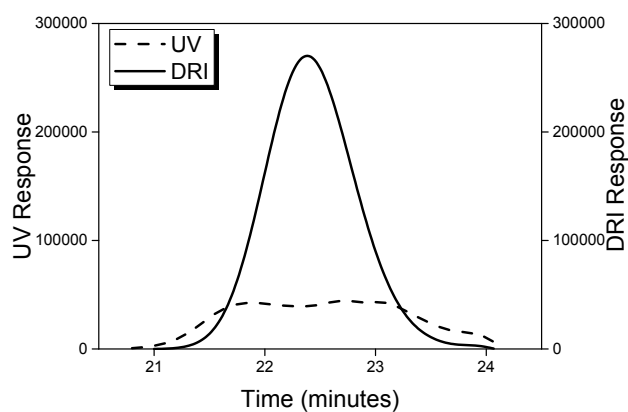

**Figure S2.** UV and DRI SEC chromatograms of ATRP macroinitiator before hydrolysis

## Preparation and characterisation of polymer-Gibbsite latex particles

Effect of  $[Cu^{2+}]$  on Gibbsite-ATRP macroinitiator dispersion

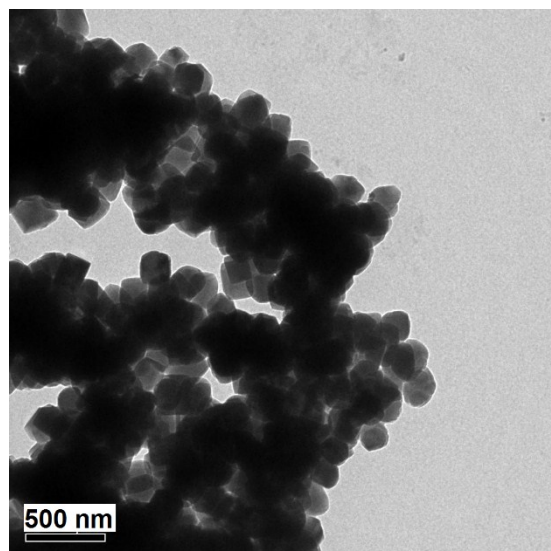

**Figure S3.** TEM micrograph of colloidal instable Gibbsite platelets after copper (II) catalyst addition.

Effect of monomer feed rate on polymer-Gibbsite latex particles morphology

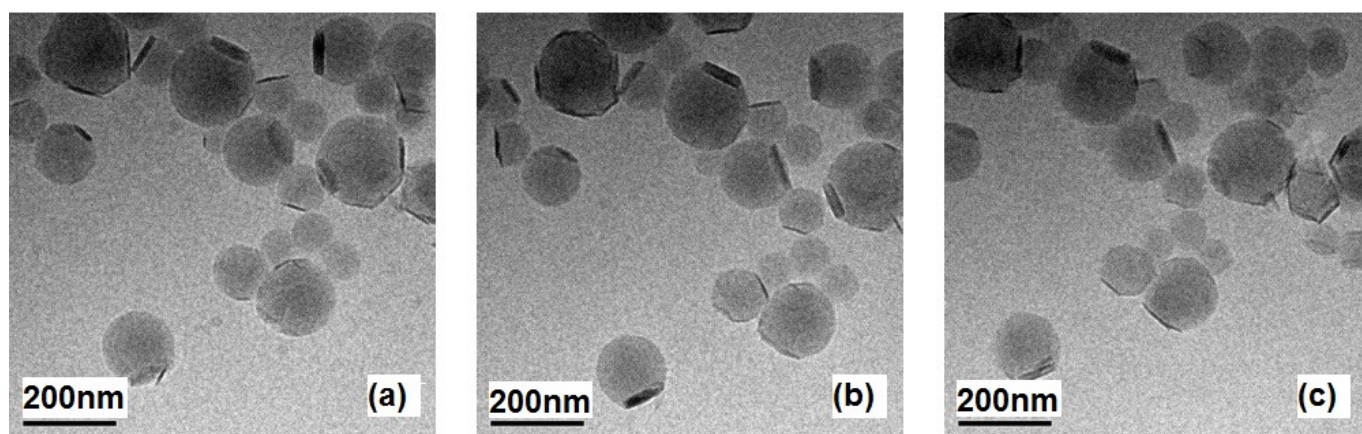

**Figure S4.** cryo-TEM images of tilt series recorded on polymer-Gibbsite latex particles obtained at the feed rate =  $4.6 \text{ mg min}^{-1}$ :  
(a) tilt  $+20^\circ$ , (b) tilt  $0^\circ$ , (c) tilt  $-20^\circ$ .

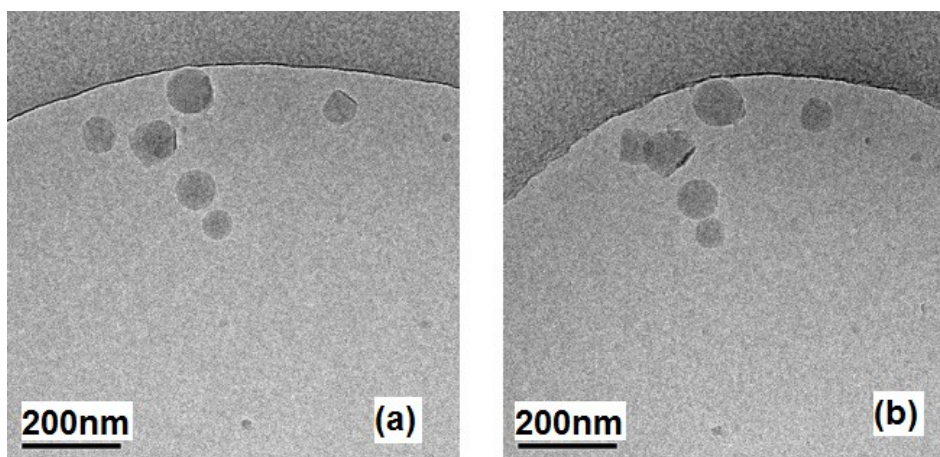

**Figure S5.** cryo-TEM images of tilt series recorded on polymer-Gibbsite latex particles obtained at the feed rate = 9 mg min<sup>-1</sup>:  
(a) tilt 0°, (b) tilt +45°.

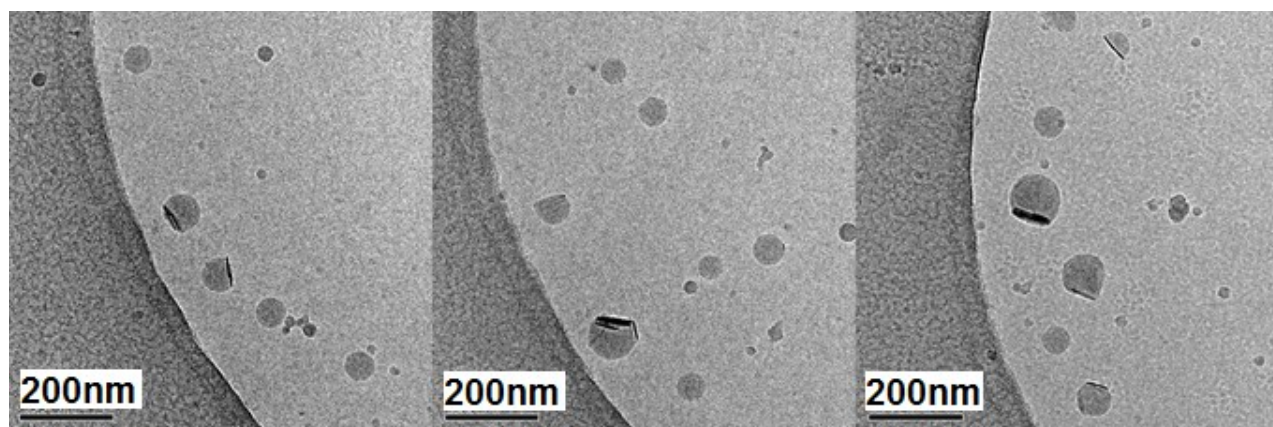

**Figure S6.** cryo-TEM images of polymer-Gibbsite latex particles obtained at the feed rate = 18 mg min<sup>-1</sup>.

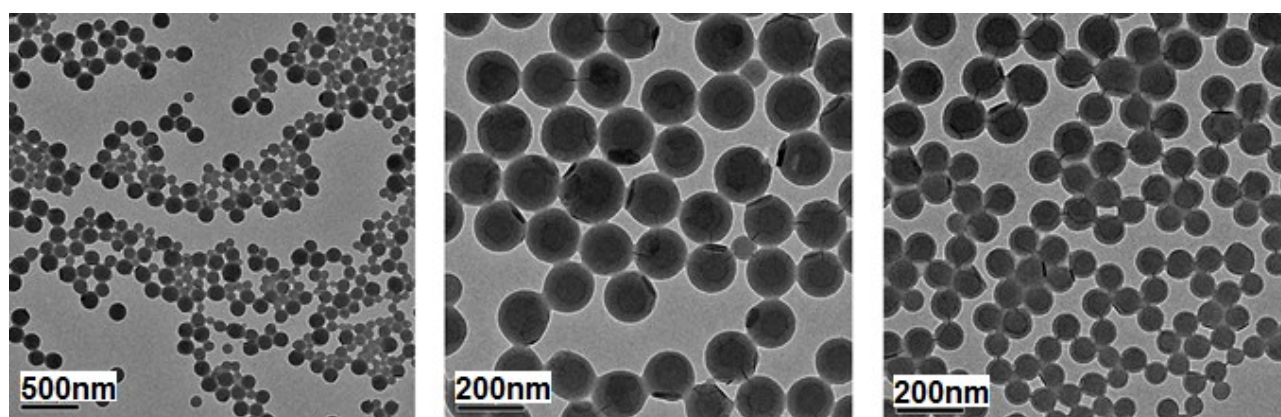

**Figure S7.** TEM images of polymer-Gibbsite latex particles obtained at the feed rate = 90 mg min<sup>-1</sup>.

## Potential loss of Br endgroups during hydrolysis of *t*-BA groups

The initiator ethyl  $\alpha$ -bromoisobutyrate was subjected to the same hydrolysis conditions as the BA-*co-t*BA cooligomers and was characterized before and after reaction by  $^1\text{H}$  and  $^{13}\text{C}$  NMR. The spectra shown in Figure S8 show that there is no significant loss in Br functionality.

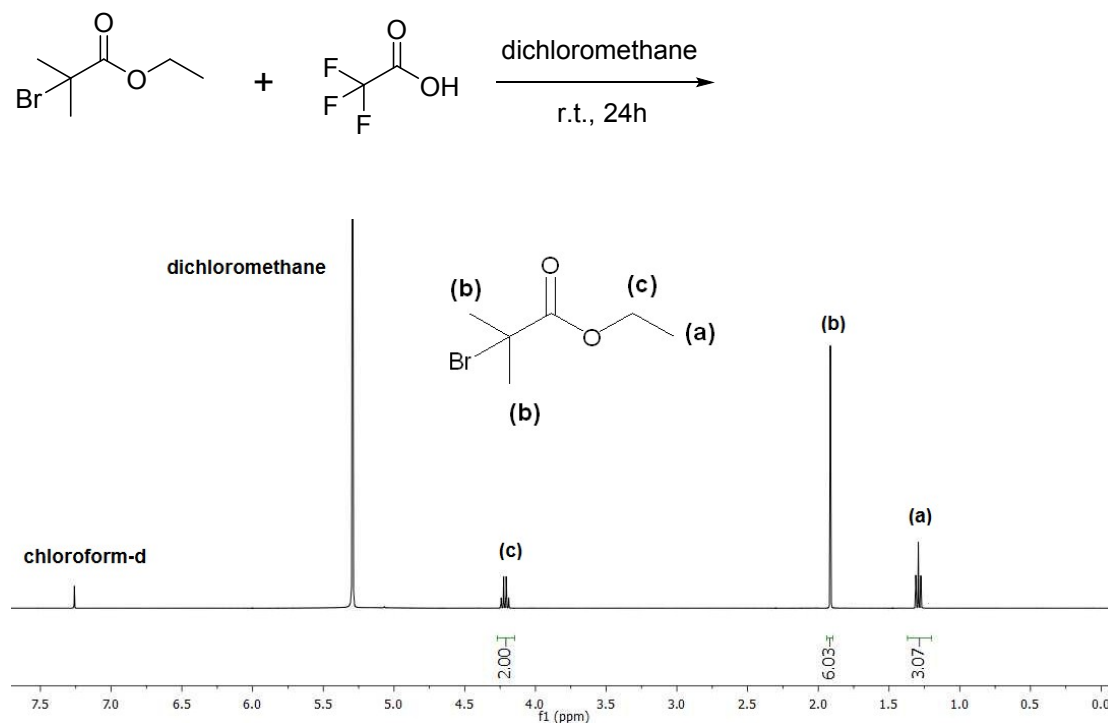

Figure S8a.  $^1\text{H}$  NMR (CDCl<sub>3</sub>) of ethyl  $\alpha$ -bromoisobutyrate in dichloromethane:  $\delta(\text{CH}_3)=1.29$ ,  $\delta(\text{C}-(\text{CH}_3)_2)=1.92$ ,  $\delta(\text{O}-\text{CH}_2)=4.25$ .

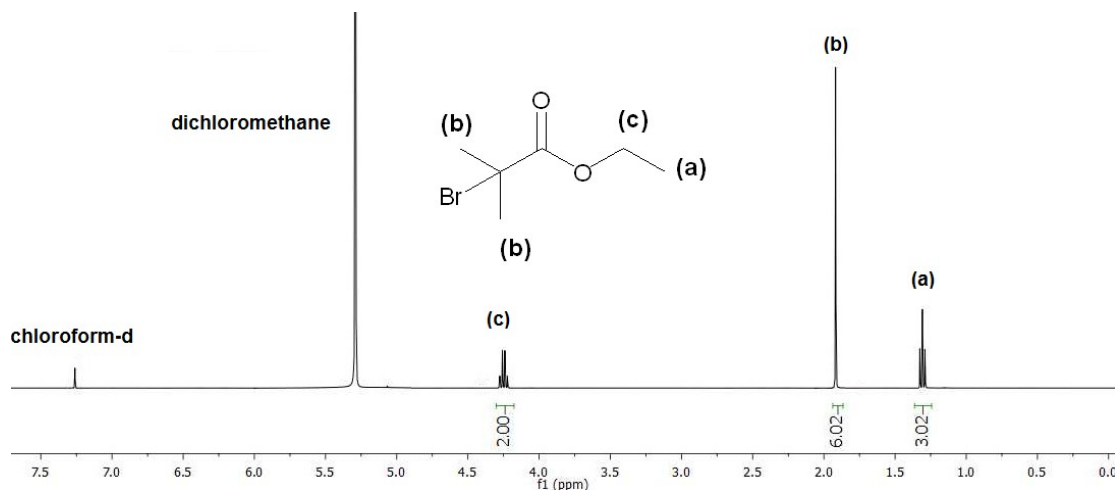

Figure S8b.  $^1\text{H}$  NMR (CDCl<sub>3</sub>) of ethyl  $\alpha$ -bromoisobutyrate in dichloromethane after addition of TFA (24h):  $\delta(\text{CH}_3)=1.3$ ,  $\delta(\text{C}-(\text{CH}_3)_2)=1.91$ ,  $\delta(\text{O}-\text{CH}_2)=4.23$ .

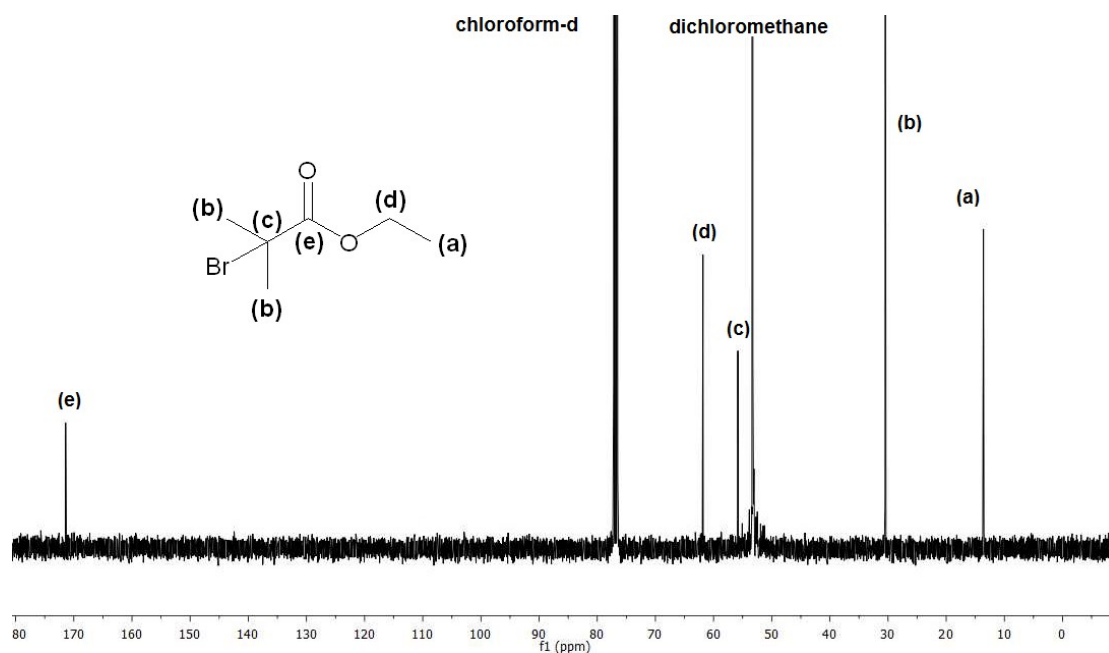

Figure S8c. <sup>13</sup>C NMR (CDCl<sub>3</sub>) of ethyl  $\alpha$ -bromoisobutyrate in dichloromethane:  $\delta(\text{CH}_3)=13.60$ ,  $\delta(\text{C}-(\text{CH}_3)_2)=30.50$ ,  $\delta(\text{Br}-\text{C}-(\text{CH}_3)_2)=55.82$ ,  $\delta(\text{O}-\text{CH}_2)=61.82$ ,  $\delta(\text{C}=\text{O})=171.41$ .

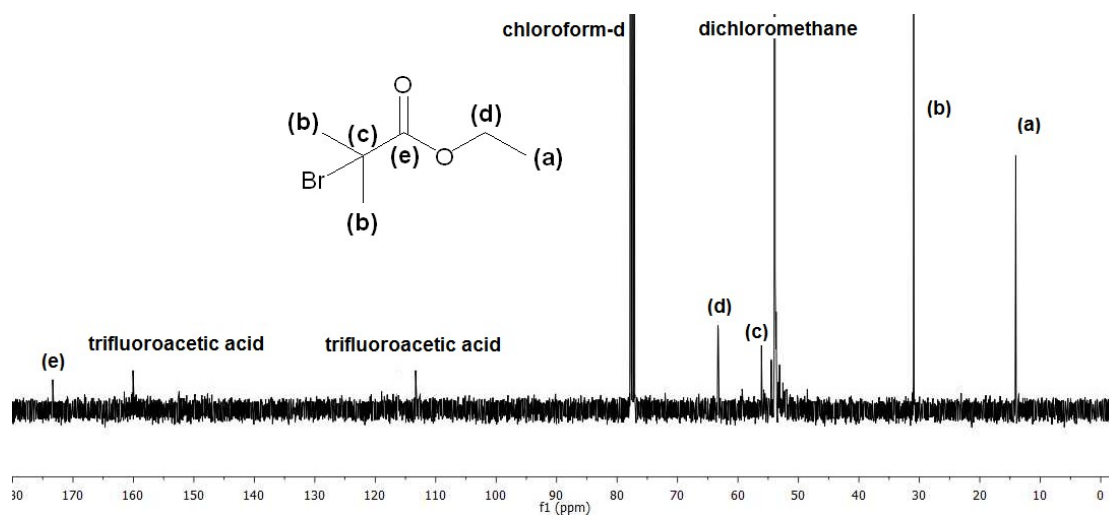

Figure 8d. <sup>13</sup>C NMR (CDCl<sub>3</sub>) of ethyl  $\alpha$ -bromoisobutyrate in dichloromethane:  $\delta(\text{CH}_3)=14.01$ ,  $\delta(\text{C}-(\text{CH}_3)_2)=30.95$ ,  $\delta(\text{Br}-\text{C}-(\text{CH}_3)_2)=56.01$ ,  $\delta(\text{O}-\text{CH}_2)=62.01$ ,  $\delta(\text{C}=\text{O})=171.98$ . Trifluoroacetic acid:  $\delta(\text{COOH})=113.33$ ,  $\delta(\text{C}-\text{F}_3)=161.24$
